# Supplementary material
Source: PubMed Central journal article supplement (PMC7178333)
Supplement: ao9b03774_si_001.pdf [file ao9b03774_si_001.pdf]

## Supporting Information

### A novel amphoteric polymer as a rheology enhancer and fluid-loss control agent for water-based drilling mud at elevated temperatures

Bahati Adnan Hamad <sup>1</sup>, Miao He<sup>1,2\*</sup>, Mingbiao Xu <sup>1,2</sup>, Weihong Liu <sup>1</sup>, Musa Mpelwa <sup>1</sup>, Shanfa Tang <sup>1,2</sup>, Lijun Jin <sup>1</sup>, and Jianjian Song <sup>1</sup>

1. School of Petroleum Engineering, Yangtze University, Wuhan China, 430100;
2. Hubei Cooperative Innovation Center of Unconventional Oil and Gas in Yangtze University, Wuhan, China, 430100.

\* Corresponding author: [hemiao@yangtzeu.edu.cn](mailto:hemiao@yangtzeu.edu.cn)

The MATLAB plots for the Bingham Plastic and Herschel-Bulkley models fittings for drilling muds studied are shown below.

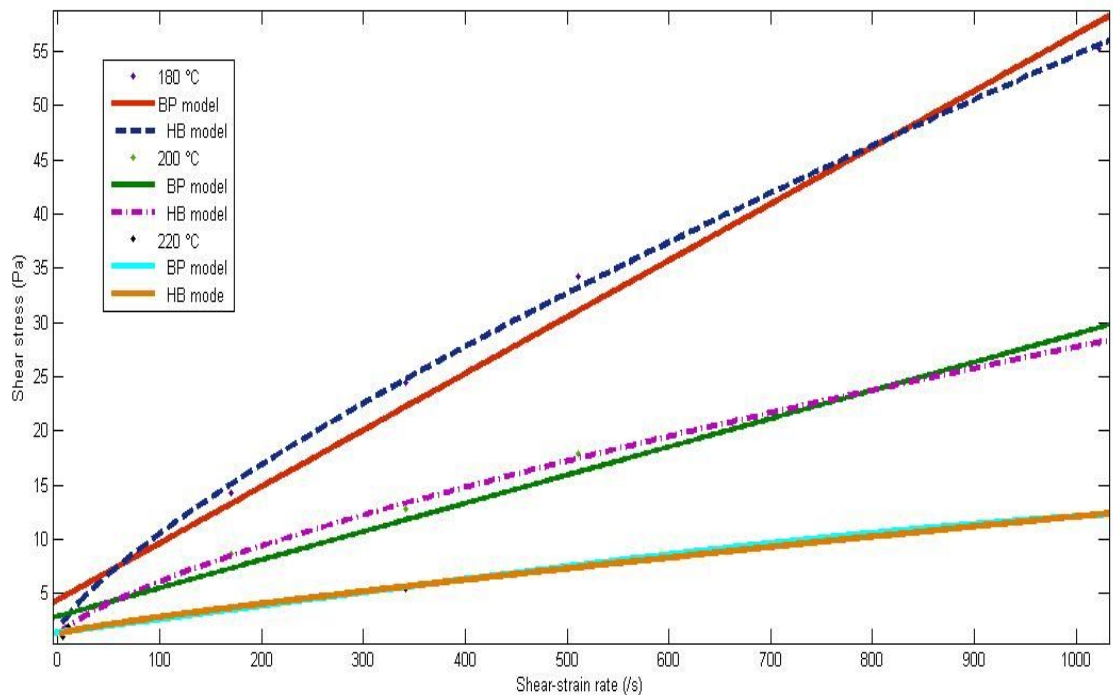

**Figure S1:** Shear stress versus shear strain rate of base fluid at different temperature

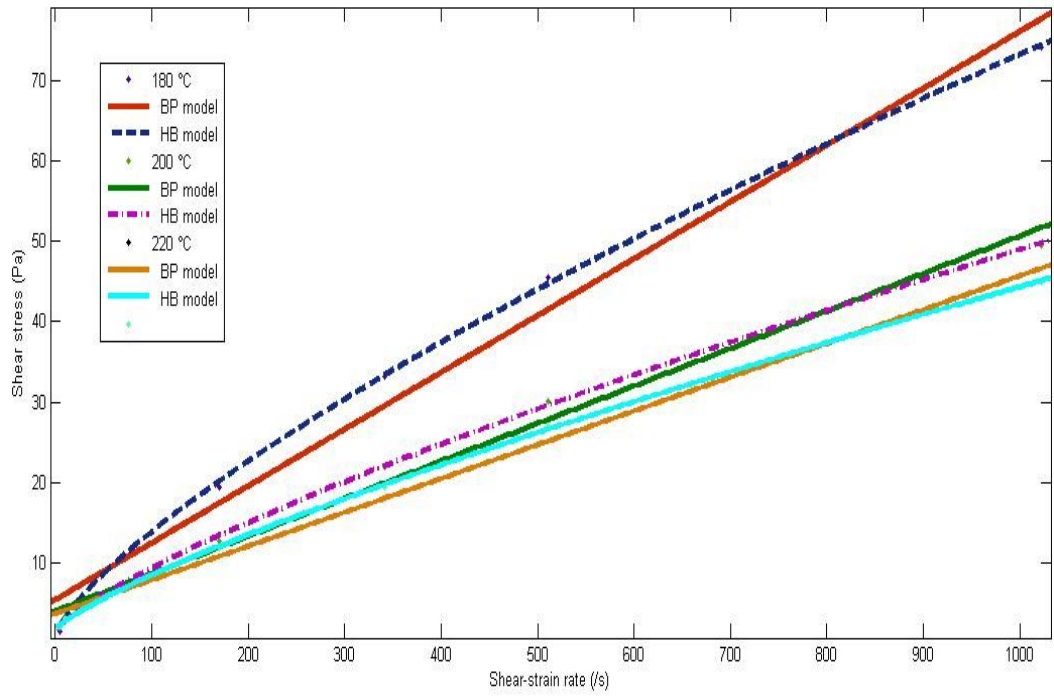

**Figure S2:** Shear stress versus shear strain rate of PAC-LV drilling fluid at different temperature

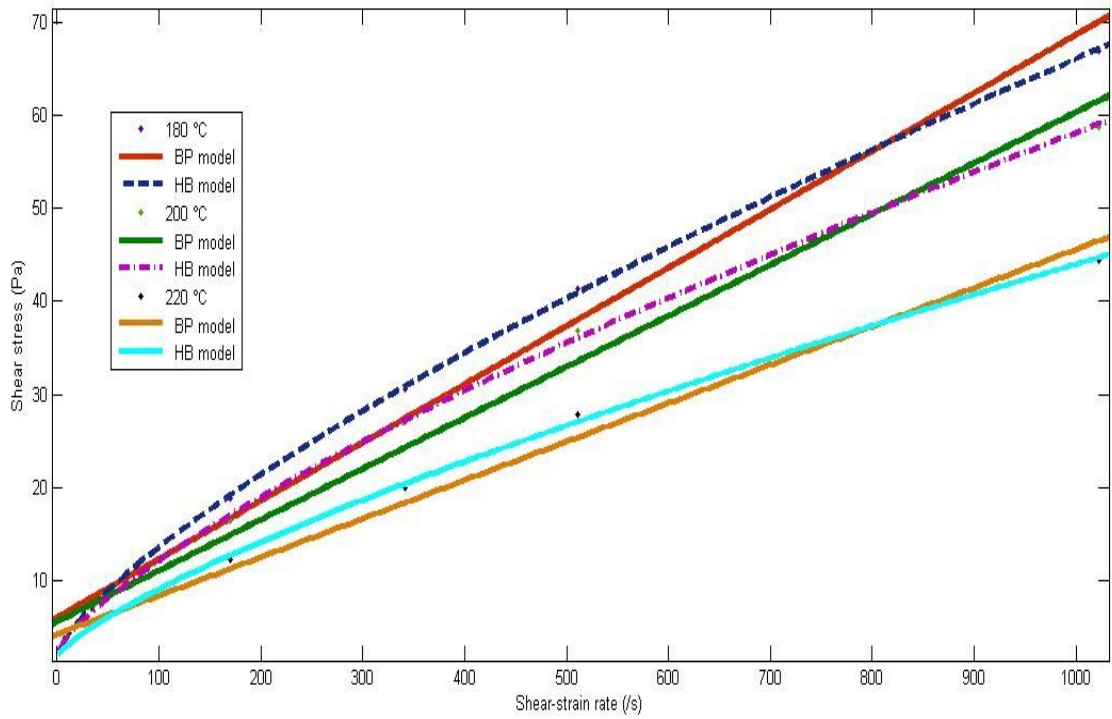

**Figure S3:** Shear stress versus shear strain rate of PAM-drilling fluid at different temperature

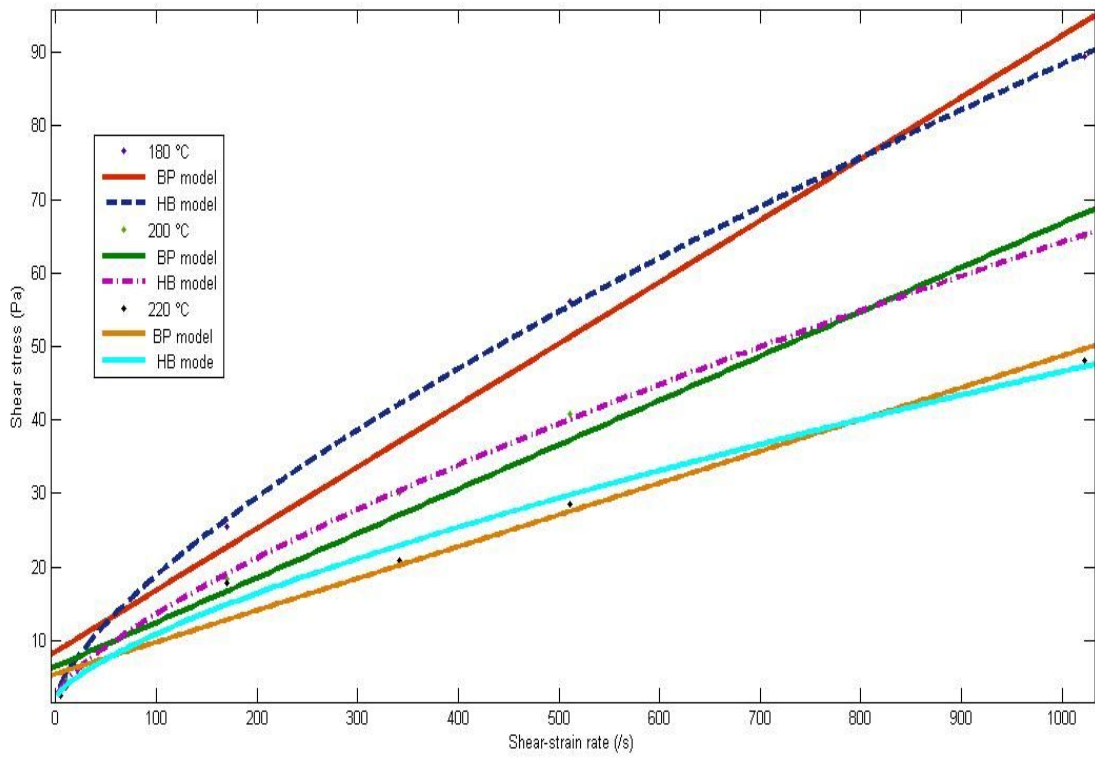

**Figure S4:** Shear stress versus shear-strain rate of PEX-drilling fluid at different temperatures
